# Supplementary material for: Effect of Diets Differing in Glycemic Index and Glycemic Load on Cardiovascular Risk Factors: Review of Randomized Controlled-Feeding Trials
Source: PubMed Central journal article supplement (PMC3705335; doi:10.3390/nu5041071), 2013-03-28
Supplement: nutrients-05-01071-s001.pdf [file nutrients-05-01071-s001.pdf]

# Supplementary Information

**Table S1.** Effect of low *versus* high GI/GL diets on additional markers of glucose homeostasis.

| Trial | Reference         | Outcome Variables                                                         | Effect | p-Value |
|-------|-------------------|---------------------------------------------------------------------------|--------|---------|
| 1     | Shikany 2009 [12] | Insulin sensitivity index (Si)                                            | ↔      | 0.55    |
|       |                   | Glucose effectiveness (Sg)                                                | ↔      | 0.36    |
|       |                   | Acute insulin response to glucose (AIRg)                                  | ↔      | 0.19    |
|       |                   | Intravenous glucose tolerance (Kg)                                        | ↔      | 0.99    |
| 2     | Hartman 2010 [13] | C-peptide (n = 64)                                                        | ↔      | 0.33    |
|       |                   | C-peptide (n = 36 IS)                                                     | ↓      | 0.05    |
|       |                   | C-peptide (n = 28 IR)                                                     | ↔      | 0.41    |
| 3     | Runchey 2012 [15] | Insulin-like growth factor-1 (IGF-1), (n = 80)                            | ↓      | 0.04    |
|       |                   | IGF-1 (n = 29 LBF)                                                        | ↔      | 0.33    |
|       |                   | IGF-1 (n = 53 HBF)                                                        | ↔      | 0.12    |
|       |                   | IGF-binding protein-3 (IGFBP-3), (n = 80)                                 | ↔      | 0.75    |
|       |                   | IGFBP-3 (n = 29 LBF)                                                      | ↔      | 0.29    |
|       |                   | IGFBP-3 (n = 53 HBF)                                                      | ↔      | 0.21    |
| 3     | Runchey 2012 [16] | Glucagon-like peptide (GLP-1), (n = 16)                                   | ↔      | 0.50    |
|       |                   | GLP-1 (n = 6 LBF)                                                         | ↔      | 0.87    |
|       |                   | GLP-1 (n = 10 HBF)                                                        | ↔      | 0.25    |
|       |                   | Glucose-dependent insulintropic polypeptide (GIP), (n = 16)               | ↔      | 0.22    |
|       |                   | GIP (n = 6 LBF)                                                           | ↔      | 0.66    |
|       |                   | GIP (n = 10 HBF)                                                          | ↔      | 0.28    |
| 5     | Solomon 2010 [19] | Fasting plasma glucose appearance rate (Basal Ra)                         | ↔      | 0.51    |
|       |                   | Insulin-stimulated rate of plasma glucose disappearance (Insulin Rd)      | ↔      | 0.31    |
|       |                   | Fasting C-peptide                                                         | ↔      | 0.09    |
|       |                   | Insulin resistance (IR)                                                   | ↔      | >0.05   |
|       |                   | Fasting insulin secretion rate (Basal ISR)                                | ↓      | 0.02    |
|       |                   | Oral glucose tolerance test ISR <sub>AUC</sub> (OGTT-ISR <sub>AUC</sub> ) | ↓      | 0.02    |
|       |                   | OGTT-C-peptide                                                            | ↓      | <0.05   |
|       |                   | OGTT-GIP                                                                  | ↓      | <0.05   |
| 5     | Malin 2011 [21]   | 2-h Glucose                                                               | ↔      | ≤0.39   |
|       |                   | 2-h Insulin                                                               | ↔      | ≤0.21   |
|       |                   | Non-esterified fatty acids (NEFA)                                         | ↔      | ≤0.22   |
|       |                   | % Carbohydrate utilization                                                | ↔      | ≤0.10   |
|       |                   | % Lipid utilization                                                       | ↔      | ≤0.10   |
|       |                   | Clamp-glucose disposal rate divided by insulin (c-GDRI)                   | ↔      | ≤0.95   |
|       |                   | c-Insulin                                                                 | ↔      | ≤0.58   |
|       |                   | c-non-oxidative glucose disposal (c-NOGD)                                 | ↔      | ≤0.13   |
|       |                   | c-% Carbohydrate utilization                                              | ↔      | ≤0.98   |
|       |                   | c-% Lipid utilization                                                     | ↔      | ≤0.98   |
|       |                   | c-NEFA                                                                    | ↔      | ≤0.12   |
|       |                   | c -% NEFA suppression                                                     | ↔      | ≤0.06   |

Numbers in the first column indicate unique trials; publications with the same number indicate same trial; GI, glycemic index; GL, glycemic load; ↓, significantly decreased compared to high GI/GL diet; ↔, non significant effect of low compared to high GI/GL diet; IS, insulin sensitive; IR, insulin resistant; LBF, low body fat; HBF, high body fat; AUC, area under the curve.

**Table S2.** Effect of low *versus* high GI/GL diets on additional variables.

| Trial | Reference           | Outcome Variables                                             | Effect | p-Value |
|-------|---------------------|---------------------------------------------------------------|--------|---------|
| 1     | Shikany 2009 [12]   | Tumor necrosis factor alpha receptor II (TNF-RII)             | ↔      | 0.72    |
|       |                     | Plasminogen activator inhibitor-1 (PAI-1)                     | ↔      | 0.93    |
|       |                     | Fibrinogen                                                    | ↔      | 0.93    |
| 2     | Hartman 2010 [13]   | Soluble TNF $\alpha$ receptor I (sTNF-RI), ( <i>n</i> = 64)   | ↔      | 0.69    |
|       |                     | sTNFRI ( <i>n</i> = 36 IS)                                    | ↔      | 0.82    |
|       |                     | sTNFRI ( <i>n</i> = 28 IR)                                    | ↔      | 0.75    |
|       |                     | soluble TNF $\alpha$ receptor II (sTNF-RII), ( <i>n</i> = 64) | ↔      | 0.58    |
|       |                     | sTNFRII ( <i>n</i> = 36 IS)                                   | ↔      | 0.87    |
|       |                     | sTNFRII ( <i>n</i> = 28 IR)                                   | ↔      | 0.30    |
| 3     | Neuhouser 2012 [17] | Serum amyloid A (SAA), ( <i>n</i> = 80)                       | ↔      | 0.46    |
|       |                     | SAA ( <i>n</i> = 29 LBF)                                      | ↔      | 0.20    |
|       |                     | SAA ( <i>n</i> = 52 HBF)                                      | ↔      | 0.50    |
|       |                     | Leptin ( <i>n</i> = 80)                                       | ↔      | 0.49    |
|       |                     | Leptin ( <i>n</i> = 29 LBF)                                   | ↔      | 0.90    |
|       |                     | Leptin ( <i>n</i> = 52 HBF)                                   | ↔      | 0.13    |
|       |                     | Adiponectin ( <i>n</i> = 80)                                  | ↔      | 0.30    |
|       |                     | Adiponectin ( <i>n</i> = 29 LBF)                              | ↔      | 0.50    |
| 5     | Solomon 2010 [19]   | Very low density lipoprotein (VLDL) cholesterol               | ↔      | 0.80    |
|       |                     | Mononuclear cell (MNC) TNF $\alpha$                           | ↓      | <0.01   |
| 5     | Kelly 2011 [20]     | MNC interleukin-6 (IL-6)                                      | ↔      | >0.05   |
|       |                     | Monocyte chemoattractant protein-1 (MCP-1)                    | ↔      | 0.07    |

Numbers in the first column indicate unique trials; publications with the same number indicate same trial; GI, glycemic index; GL, glycemic load; ↓, significantly decreased compared to high GI/GL diet; ↔, non significant effect of low compared to high GI/GL diet.

**Table S3.** Effect of low *versus* high GI/GL diets on postprandial variables of glucose homeostasis.

| Trial                        | Reference         | Outcome variables *                                                | Effect | p-Value |
|------------------------------|-------------------|--------------------------------------------------------------------|--------|---------|
| 3                            | Runchey 2012 [15] | Glucose ( <i>n</i> = 20)                                           | ↓      | <0.01   |
|                              |                   | Glucose ( <i>n</i> = 8 LBF)                                        | ↔      | 0.08    |
|                              |                   | Glucose ( <i>n</i> = 12 HBF)                                       | ↓      | <0.01   |
|                              |                   | Insulin ( <i>n</i> = 20)                                           | ↓      | <0.01   |
|                              |                   | Insulin ( <i>n</i> = 8 LBF)                                        | ↓      | <0.01   |
|                              |                   | Insulin ( <i>n</i> = 12 HBF)                                       | ↓      | <0.01   |
|                              |                   | Insulin-like growth factor-1, IGF-1 ( <i>n</i> = 20)               | ↔      | 0.79    |
|                              |                   | IGF-1 ( <i>n</i> = 8 LBF)                                          | ↔      | 0.94    |
|                              |                   | IGF-1 ( <i>n</i> = 12 HBF)                                         | ↔      | 0.69    |
|                              |                   | IGF-binding protein-3, IGFBP-3 ( <i>n</i> = 20)                    | ↔      | 0.15    |
|                              |                   | IGFBP-3 ( <i>n</i> = 8 LBF)                                        | ↔      | 0.79    |
| IGFBP-3 ( <i>n</i> = 12 HBF) | ↔                 | 0.11                                                               |        |         |
| 3                            | Runchey 2012 [16] | Glucose ( <i>n</i> = 16)                                           | ↓      | <0.01   |
|                              |                   | Glucose ( <i>n</i> = 6 LBF)                                        | ↓      | <0.01   |
|                              |                   | Glucose ( <i>n</i> = 10 HBF)                                       | ↓      | <0.01   |
|                              |                   | Insulin ( <i>n</i> = 16)                                           | ↓      | <0.01   |
|                              |                   | Insulin ( <i>n</i> = 6 LBF)                                        | ↓      | <0.01   |
|                              |                   | Insulin ( <i>n</i> = 10 HBF)                                       | ↓      | <0.01   |
|                              |                   | Glucagon-like peptide 1, GLP-1 ( <i>n</i> = 16)                    | ↑      | 0.03    |
|                              |                   | GLP-1 ( <i>n</i> = 6 LBF)                                          | ↔      | 0.27    |
|                              |                   | GLP-1 ( <i>n</i> = 10 HBF)                                         | ↑      | 0.03    |
|                              |                   | Glucose-dependent insulinotropic polypeptide, GIP ( <i>n</i> = 16) | ↓      | <0.01   |
|                              |                   | GIP ( <i>n</i> = 6 LBF)                                            | ↓      | <0.01   |
| GIP ( <i>n</i> = 10 HBF)     | ↓                 | 0.03                                                               |        |         |

\* All values represent incremental area under the curve. Numbers in the first column indicate unique trials; publications with the same number indicate same trial; GI, glycemic index; GL, glycemic load; ↑ or ↓, significantly increased or decreased compared to high GI/GL diet; ↔, non significant effect of low compared to high GI/GL diet; LBF, low body fat; HBF, high body fat.

© 2013 by the authors; licensee MDPI, Basel, Switzerland. This article is an open access article distributed under the terms and conditions of the Creative Commons Attribution license (<http://creativecommons.org/licenses/by/3.0/>).
